# Supplementary material for: The RNA-binding protein CsrA plays a central role in positively regulating virulence factors in Erwinia amylovora
Source: PubMed Central journal article supplement (PMC5109040; doi:10.1038/srep37195), 2016-11-15
Supplement: srep37195-s1.pdf [file srep37195-s1.pdf]

**The RNA-binding protein CsrA plays a central role in positively regulating virulence factors in *Erwinia amylovora***

Veronica Ancona<sup>1, §</sup>, Jae Hoon Lee<sup>1</sup>, and Youfu Zhao<sup>1, \*</sup>

**Supplementary Figure S1. Sequence of *csrB* sRNA.**

**Supplementary Figure S2. Growth of the *csrA*, *csrB*, *glgCAP* and *csrA/glgCAP* double mutants of *Erwinia amylovora*.** Growth of wild type, mutants and complementation strains in LB (A and C) and MBMA (B and D) medium measured by spectrometry at 600 nm. The experiments were repeated three times with three replicates.

**Supplementary Figure S3. A) Effect of the *csrA* and *csrB* mutations on glycogen accumulation.** Overnight cultures of the WT, mutants and complementation strains were centrifuged, suspended in 0.5 X PBS and spotted onto Kornberg medium (1.1% K<sub>2</sub>HPO<sub>4</sub>, 0.85% KH<sub>2</sub>PO<sub>4</sub>, 0.6% yeast extract, 1% glucose) agar plates. After 24 h incubation at 28°C, the plates were exposed to iodine vapor for 10 min to assess glycogen accumulation<sup>1,2</sup>. The experiments were repeated at least three times. B) **Hypersensitive response (HR) assay on tobacco leaves.** Photos were taken at 24h post inoculation. Overnight cultures of *E. amylovora* WT, mutants and complementation strains were harvested by centrifugation and suspended in 0.5x PBS to OD<sub>600</sub> of 0.1. Bacterial suspensions were infiltrated into tobacco leaves (*Nicotiana tabaccum*) by needle-less syringe. HR symptoms were recorded after 24h post infiltration. HR experiments were repeated three times.

Reference:

1. Ancona, V., Li, W. & Zhao, Y. F. Alternative sigma factor RpoN and its modulator protein YhbH are indispensable for *Erwinia amylovora* virulence. *Mol. Plant Pathol.* 15,58-66 (2014).
2. Romeo, T., Kumar, A. & Preiss, J. Analysis of the *Escherichia coli* glycogen gene cluster suggests that catabolic enzymes are encoded among the biosynthetic genes. *Gene* 70, 363–376 (1988).

**Supplementary Figure S4.** Full-length Western blot for HrpA-His was presented. See Figure 5 for details.

**Fig. S1. *csrB* sRNA coding sequence (position 295579 to 2956033)**

Genome accession #FN666575 for *E. amylovora* strain ATCC49946

```
GTTGCGAAGGAACAGCATGATATGAGATTAACATCAGGATGATGTGCTCATTGAAGGATTGAAT
CATCGGGATGATGTATCAGGGACAGGCTCCAGGATGGGGTACAGGAACTTCAGGAAGAGGTCA
GGAACATCTCCAGGATGGAGAAACGCGCCGTAAGGGACATTCGGCAGTCATGGATGATAACAGG
ATCACTATCAGGATGATATTTTCAGGGACAGGCTTCAGGATGAAGCAAAGGAGATCTCAGGAAGA
GGTAATGGACACCTCCAGGACGGAGAATGTGAGCCGTAAAGGACTATTGGCGGGCATGGAAGTC
AAAGGATCGACGTCAGGAAGATGTCTGCTCAGGAAAGCGCATGGACCAGTTTTCAAGGATGAGC
AGGGAGCATAAATGTAGCCGGATAGCTGCAAACGAACCGGGGGCACTGTTTATACAGTGCCCCC
TTTTTTT
```

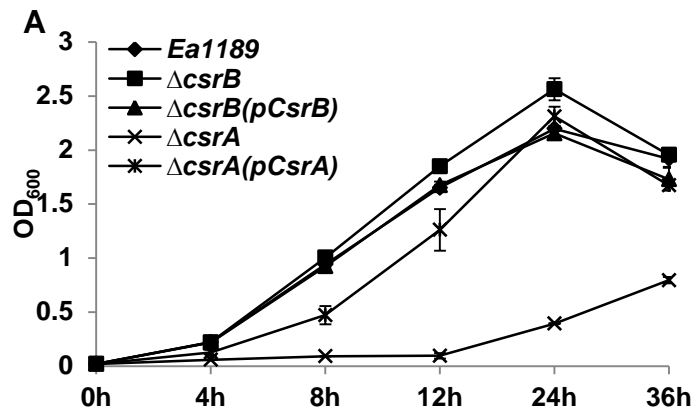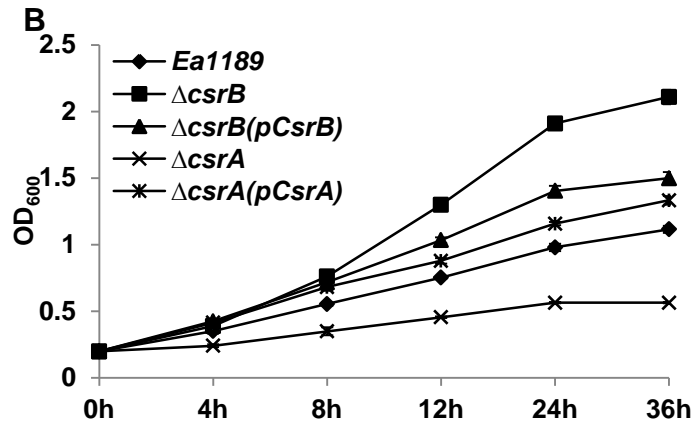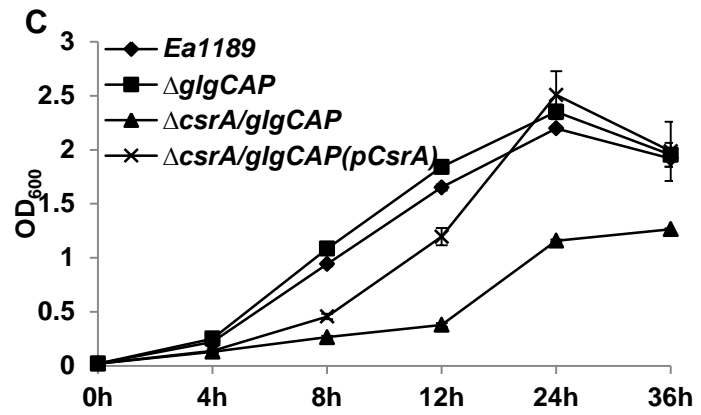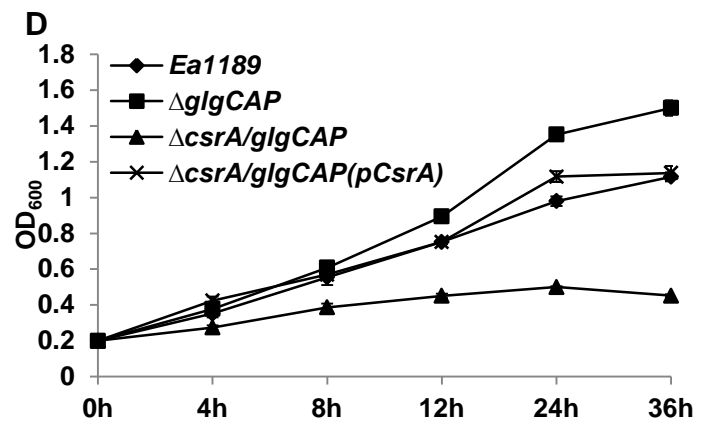

**A**

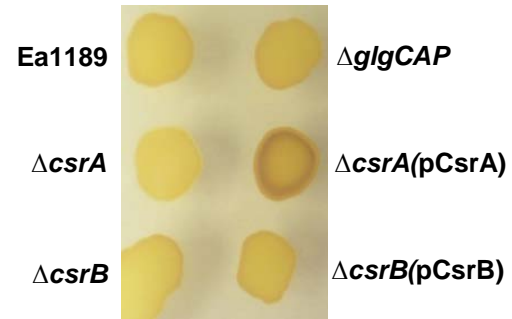

**B**

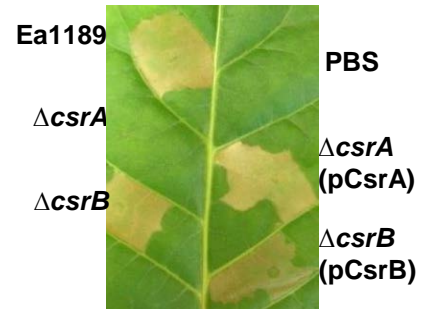

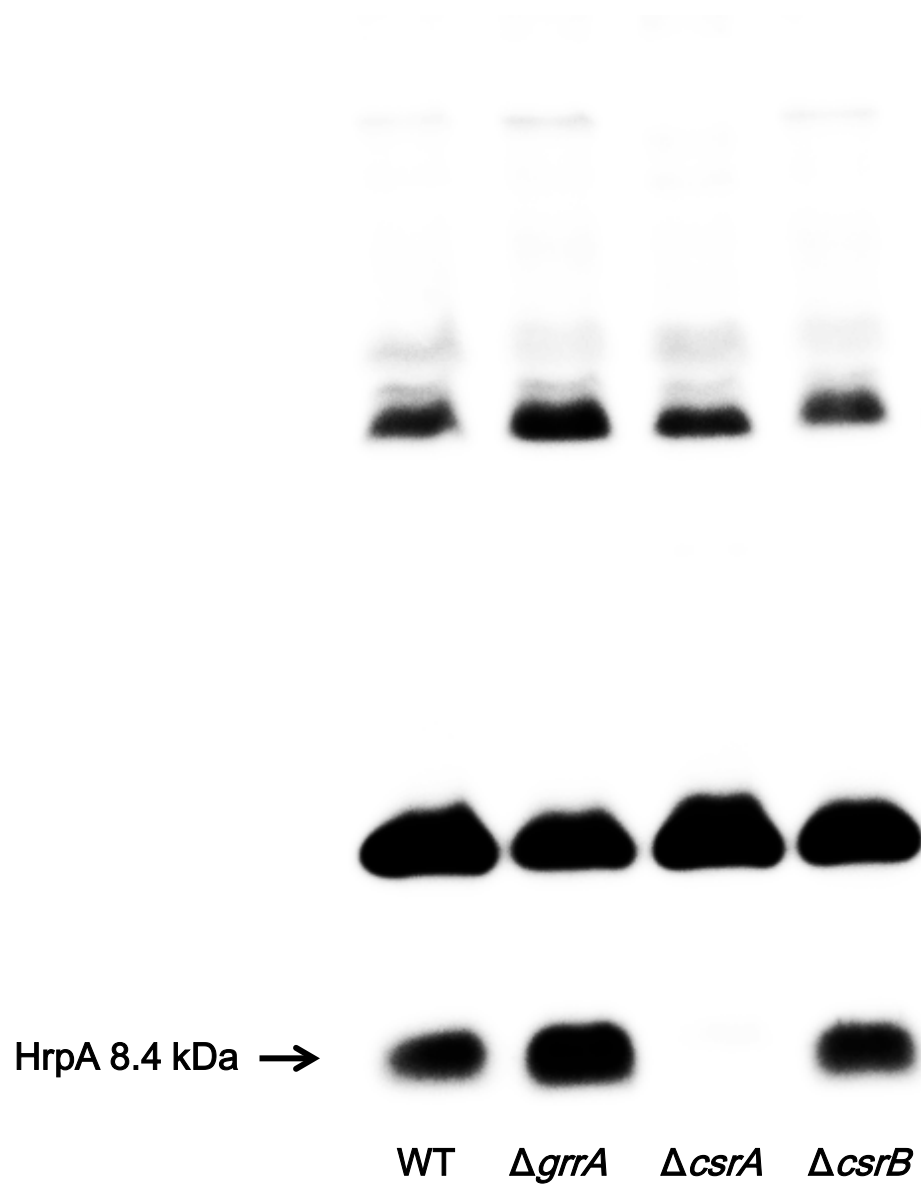

**Supplementary Table S1. List of primers used in this study**

| Primers              | Sequence (5'-3')                                                             | Source or reference |
|----------------------|------------------------------------------------------------------------------|---------------------|
| <i>Mutagenesis</i>   |                                                                              |                     |
| csrA-F               | ATGCTTATTCTAACTCGTCGAGTTGGTGAAACCCTCATG                                      | This study          |
| csrA-R               | ATCGGTGATGACGATTGTGTAGGCTGGAGCT<br>TTAGTAACTCGTTTGCTGCGTCTTTTCGGCCTGTATACGC  | This study          |
| csrB-F               | TGATAGATCTATTCCGGGGATCCGTCGACC<br>GTTGCGAAGGAACAGCATGATATGAGATTAACATCAGG     | This study          |
| csrB-R               | ATGATGTGCTCAGCGATTGTGTAGGCTGGAGCT<br>AAAAAAAGGGGGCACTGTATAAACAGTGCCCCCGGTTT  | This study          |
| glgCAP-F             | GTTTGCAGCTATATTCCGGGGATCCGTCGACC<br>ATGGTGAAATTAGAGAAGAACGACCCTGTGATGCTGGC   | This study          |
| glgCAP-R             | AAGGCAATTACCCGATTGTGTAGGCTGGAGCT<br>CTATAACTGAACCGGCTCAATACCCCAAATTTTCGTCGGC | This study          |
| csrA-c1              | ATATTCTTTGAATTCCGGGGATCCGTCGACC<br>GGTACGGATGCAATGGCTTT                      | This study          |
| csrA-c2              | TGCCTAAACCAGCTTAATGGA                                                        | This study          |
| csrB-c1              | GCCTGCCCTGTACGAGAT                                                           | This study          |
| csrB-c2              | GGCCTGTTTGAGTAACGAT                                                          | This study          |
| glgCAP-c1            | ACGTGTGCGATCTGGTGTTA                                                         | This study          |
| glgCAP-c2            | TCCTGGATTCATAGCCAGAC                                                         | This study          |
| Cm1                  | TTATACGCAAGGCGACAAGG                                                         | 14                  |
| Cm2                  | GATCTTCCGTCACAGGTAGG                                                         | 14                  |
| <i>Cloning</i>       |                                                                              |                     |
| csrA-coF             | GTACGGATGCAATGGCTTT                                                          | This study          |
| csrA-coR             | TGCCTAAACCAGCTTAATGGA                                                        | This study          |
| csrB-coF             | CGCGTTCTATACTTCTCAGTTTCG                                                     | This study          |
| csrB-coR             | CTCCAGCGCGACTTCATAAT                                                         | This study          |
| <i>Real time PCR</i> |                                                                              |                     |
| csrA-rt1             | TCATGATCGGTGATGAGGTG                                                         | This study          |
| csrA-rt2             | ACTCGTTTGCTGCGTCTTTT                                                         | This study          |
| csrB-rt1             | CCTGACGTCGATCCTTTGAC                                                         | This study          |
| csrB-rt2             | GTAAGGGACATTCGGCAGTC                                                         | This study          |
| rcsA-rt1             | TTAAACCTGTCTGTGCGTCA                                                         | 67                  |
| rcsA-rt2             | AGAAACCGTTTTGGCTTTGA                                                         | 67                  |
| amsG-rt1             | CAAAGAGGTGCTGGAAGAGG                                                         | 67                  |
| amsG-rt2             | GTTCCATAGTTGCGGCAGTT                                                         | 67                  |
| rpoN-rt1             | AAGCGGTACTGAAACGGGTA                                                         | 7                   |
| rpoN-rt2             | GCATCAGACTGCGAAAATCA                                                         | 7                   |
| yhbH-rt1             | GCGCGAGTTTGTTACCACTA                                                         | 7                   |
| yhbH-rt2             | ATCGCCGCGTACATATCTTT                                                         | 7                   |
| hrpS-rt1             | AACAATGGCGTTTGCGTTGC                                                         | 7                   |
| hrpS-rt2             | AATGCTACGCGTGCTGGAAA                                                         | 7                   |
| hrpL-rt1             | TTAAGGCAATGCCAAACACC                                                         | 7                   |
| hrpL-rt2             | GACGCGTGCATCATTTTATT                                                         | 7                   |
| dspE-rt1             | TCCAGCGAGGGCATAATACT                                                         | 67                  |
| dspE-rt2             | ACAACCGTACCCTGCAAAAAC                                                        | 67                  |
| 16S-rt1              | TGTAGCGGTGAAATGCGTAG                                                         | 67                  |
| 16S-rt2              | CCTCCAAGTCGACATCGTTT                                                         | 67                  |
